# Supplementary material for: Metagenomics survey unravels diversity of biogas microbiomes with potential to enhance productivity in Kenya
Source: PLOS journal article supplement (doi:10.1371/journal.pone.0244755), 2021-01-04
Supplement: S10 (10.1371/journal.pone.0244755.s010) [file journal.pone.0244755.s010]

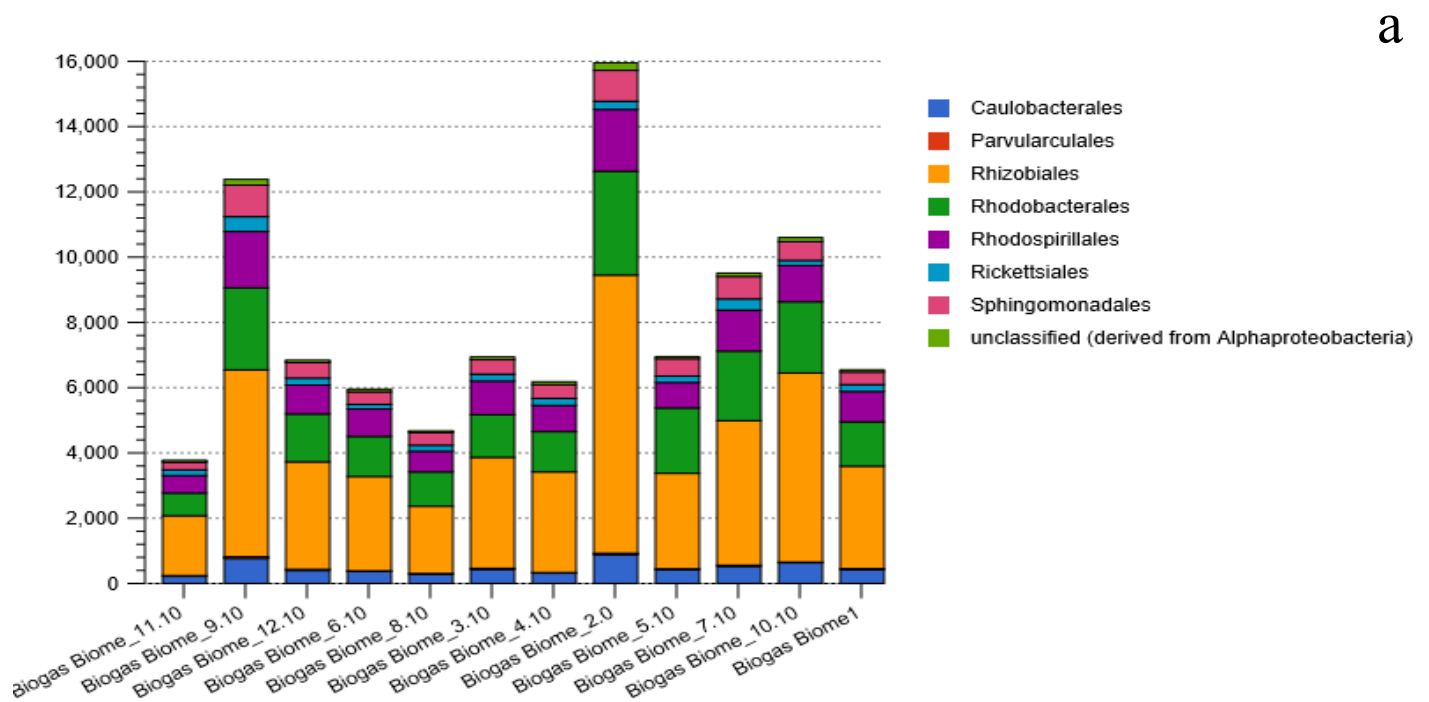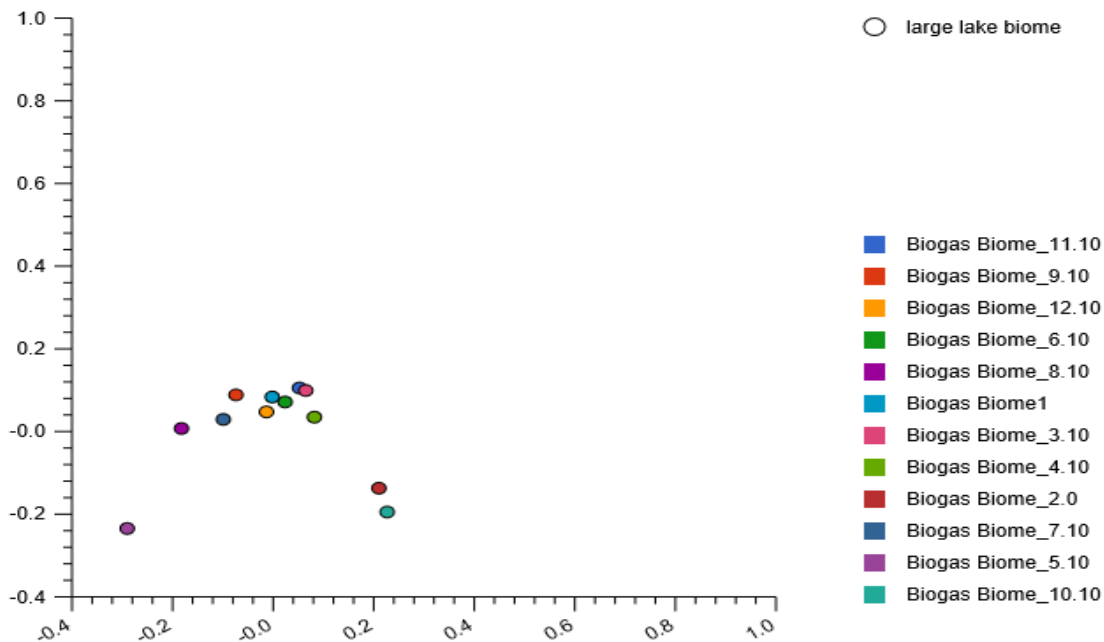

**S9 Fig. Stacked barchat (a) showing the seven  $\alpha$ -Proteobacteria orders, relative abundances and their PCoA plots (b), revealing the nucleotide composition variation among the reactors based on the Euclidean model. The plots revealed close proximity of reactor 1 and 6 nucleotide composition and were positioned on the y-axis. However, the composition of reactor 3 and 11 clustered partially on the upper right quadrant while the nucleotide compositions of the other treatments were found to reveal dissimilarity.**
