# Supplementary material for: Metagenomics survey unravels diversity of biogas microbiomes with potential to enhance productivity in Kenya
Source: PLOS journal article supplement (doi:10.1371/journal.pone.0244755), 2021-01-04
Supplement: S38 (10.1371/journal.pone.0244755.s038) [file journal.pone.0244755.s038]

a

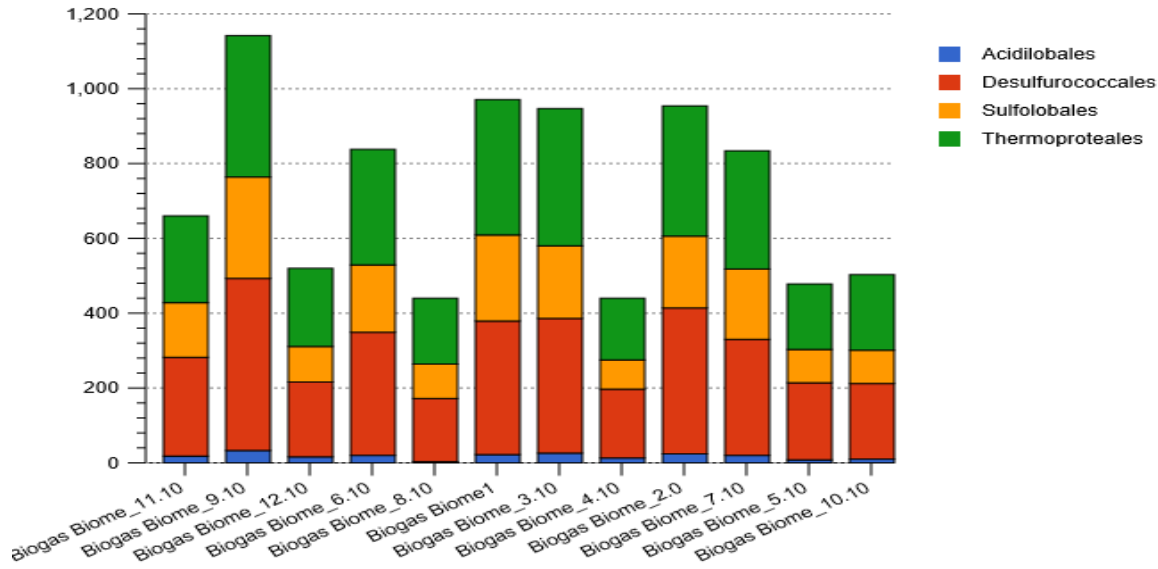

b

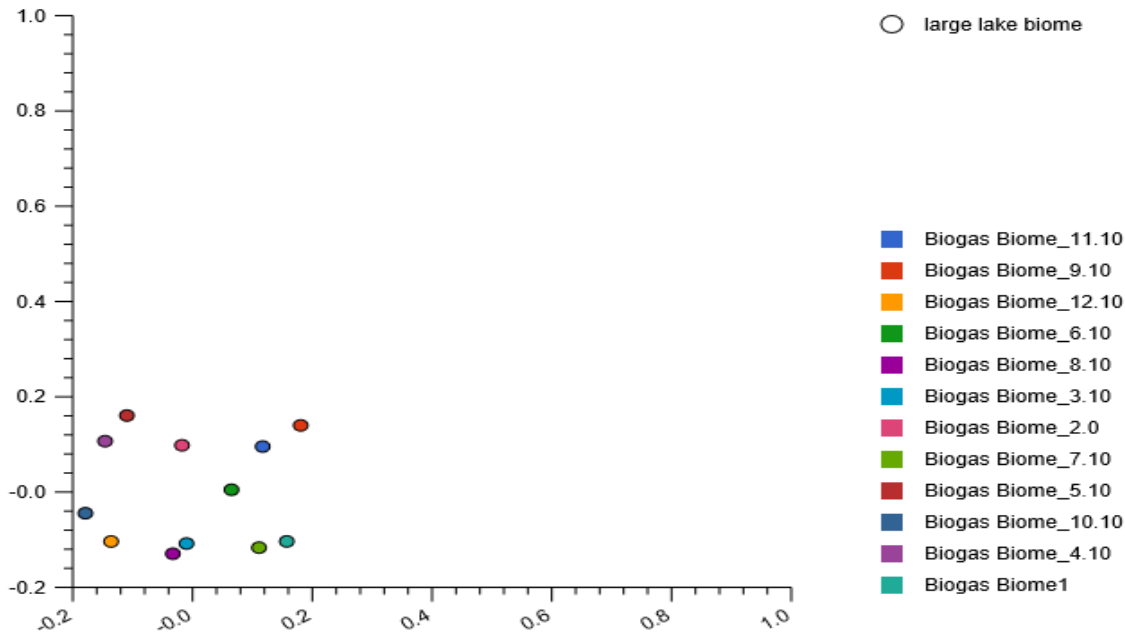

**S37 Fig. Stacked barchat (a) showing four Thermoprotei orders and their PCoA plot (b) based on the Euclidean model. The plot reveal nucleotide composition dissimilarities among the twelve treatments. The PCoA plot revealed partial clustering of reactor 1 and 7 nucleotide composition on the upper left quadrant of the plot. Further the composition of reactor 2 and 10 and those of reactor 4 and 8 were found to be in close proximity on the lower right quadrant of the plot.**
